# Supplementary material
Source: publisher figshare collection journal article supplement (https://tandf.figshare.com/articles/dataset/_/6987038)
Supplement: Supplementary file 2 [file 3]

Archive with 2 entries (2 files):
- ucgs_a_1513367_sm2685.tgz
- ucgs_a_1513367_sm2679.pdf
